# Supplementary material for: Study protocol: realist evaluation of effectiveness and sustainability of a community health workers programme in improving maternal and child health in Nigeria
Source: Springer Nature journal article supplement (doi:10.1186/s13012-016-0443-1), 2015-12-01

### Additional file 5: Pre-implementation Logic Map for SURE-P/MCH

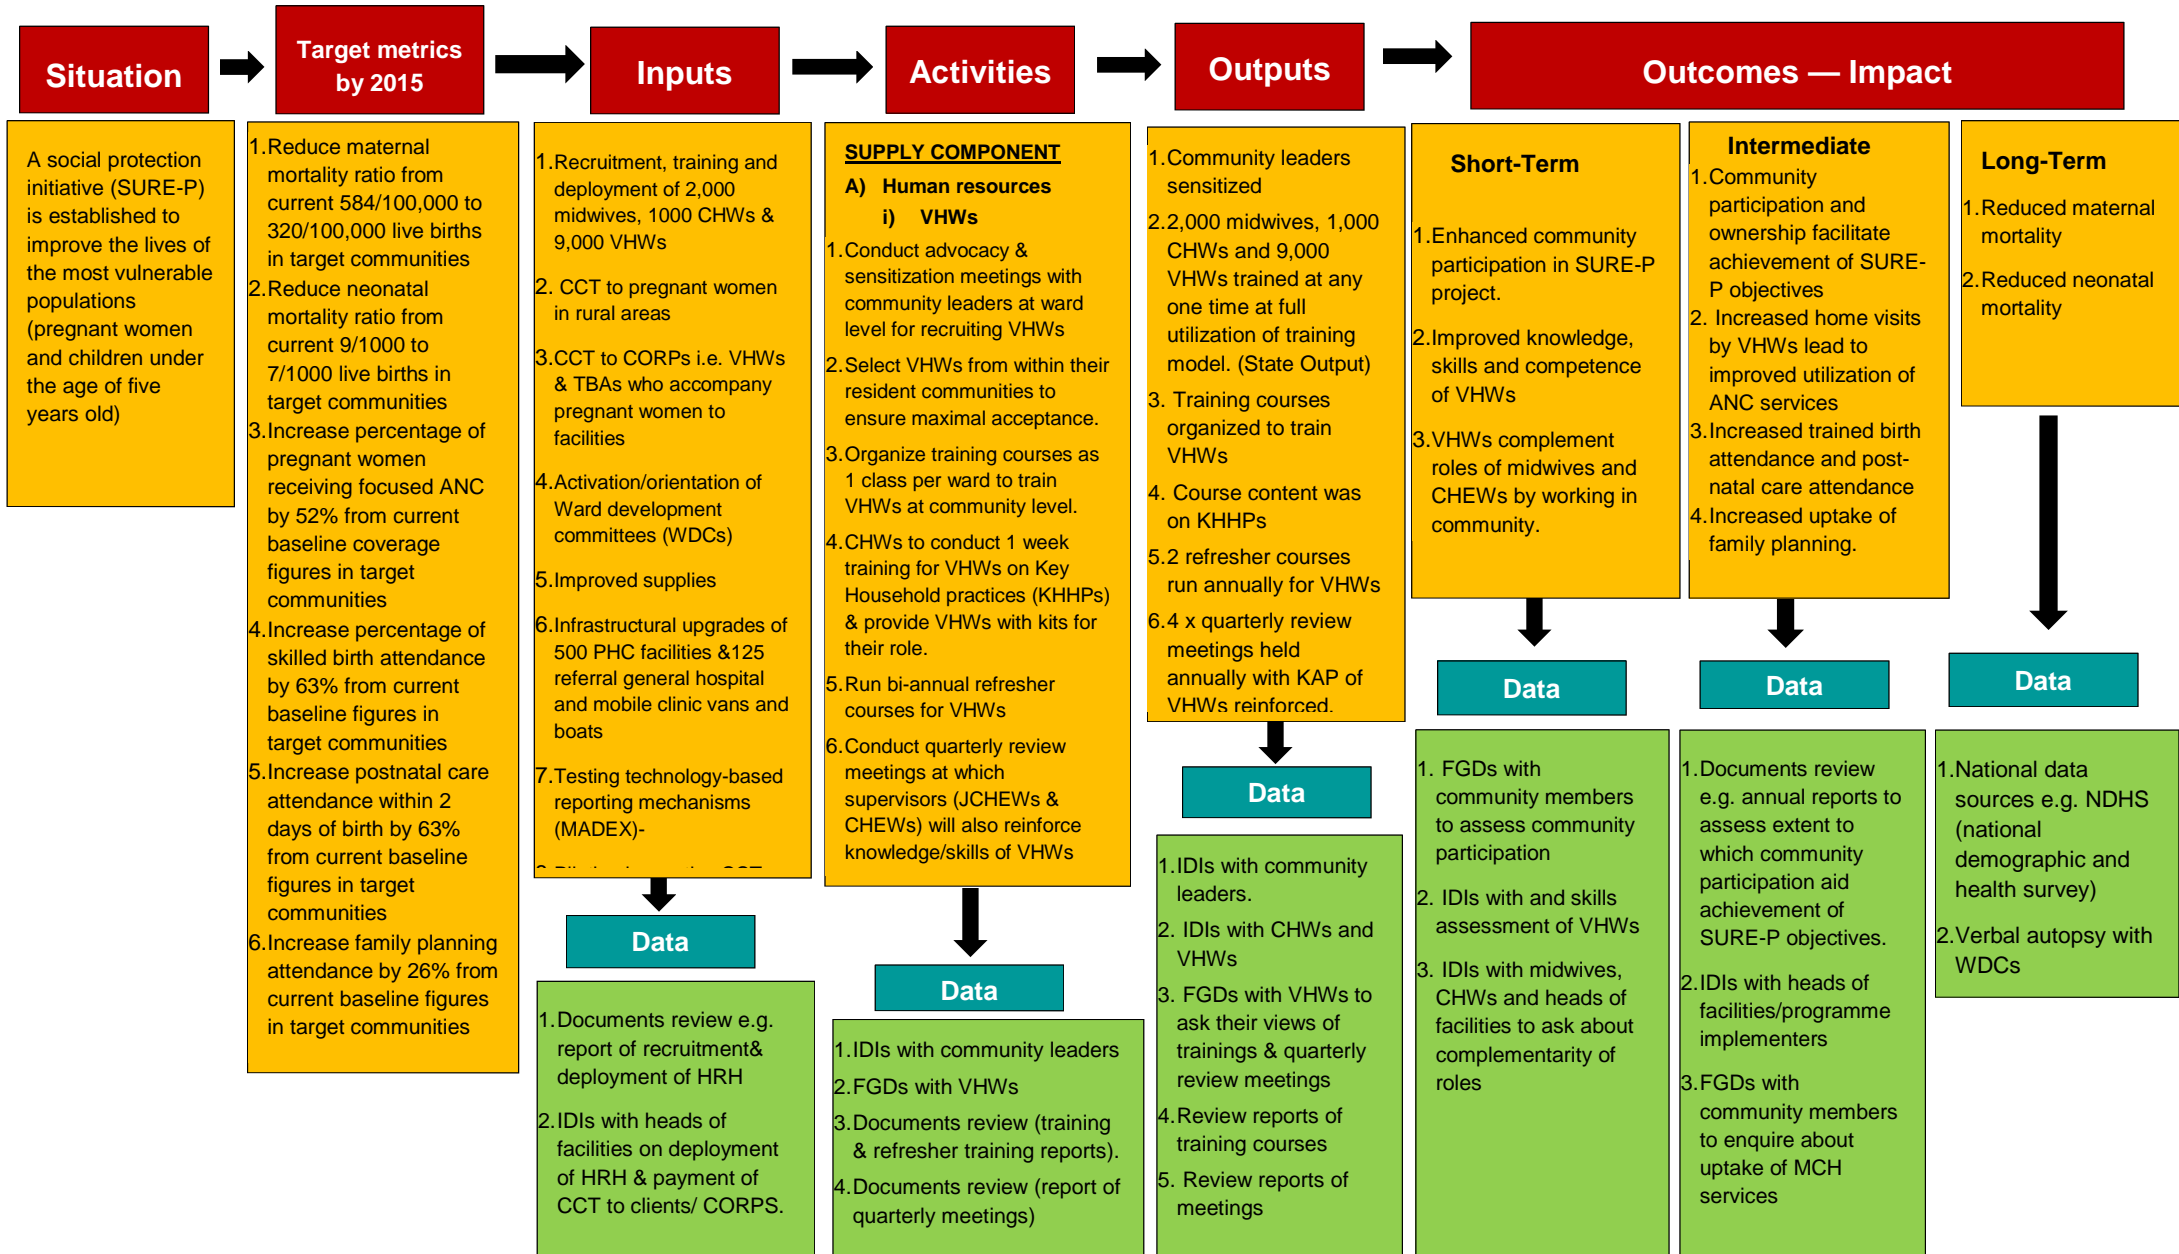

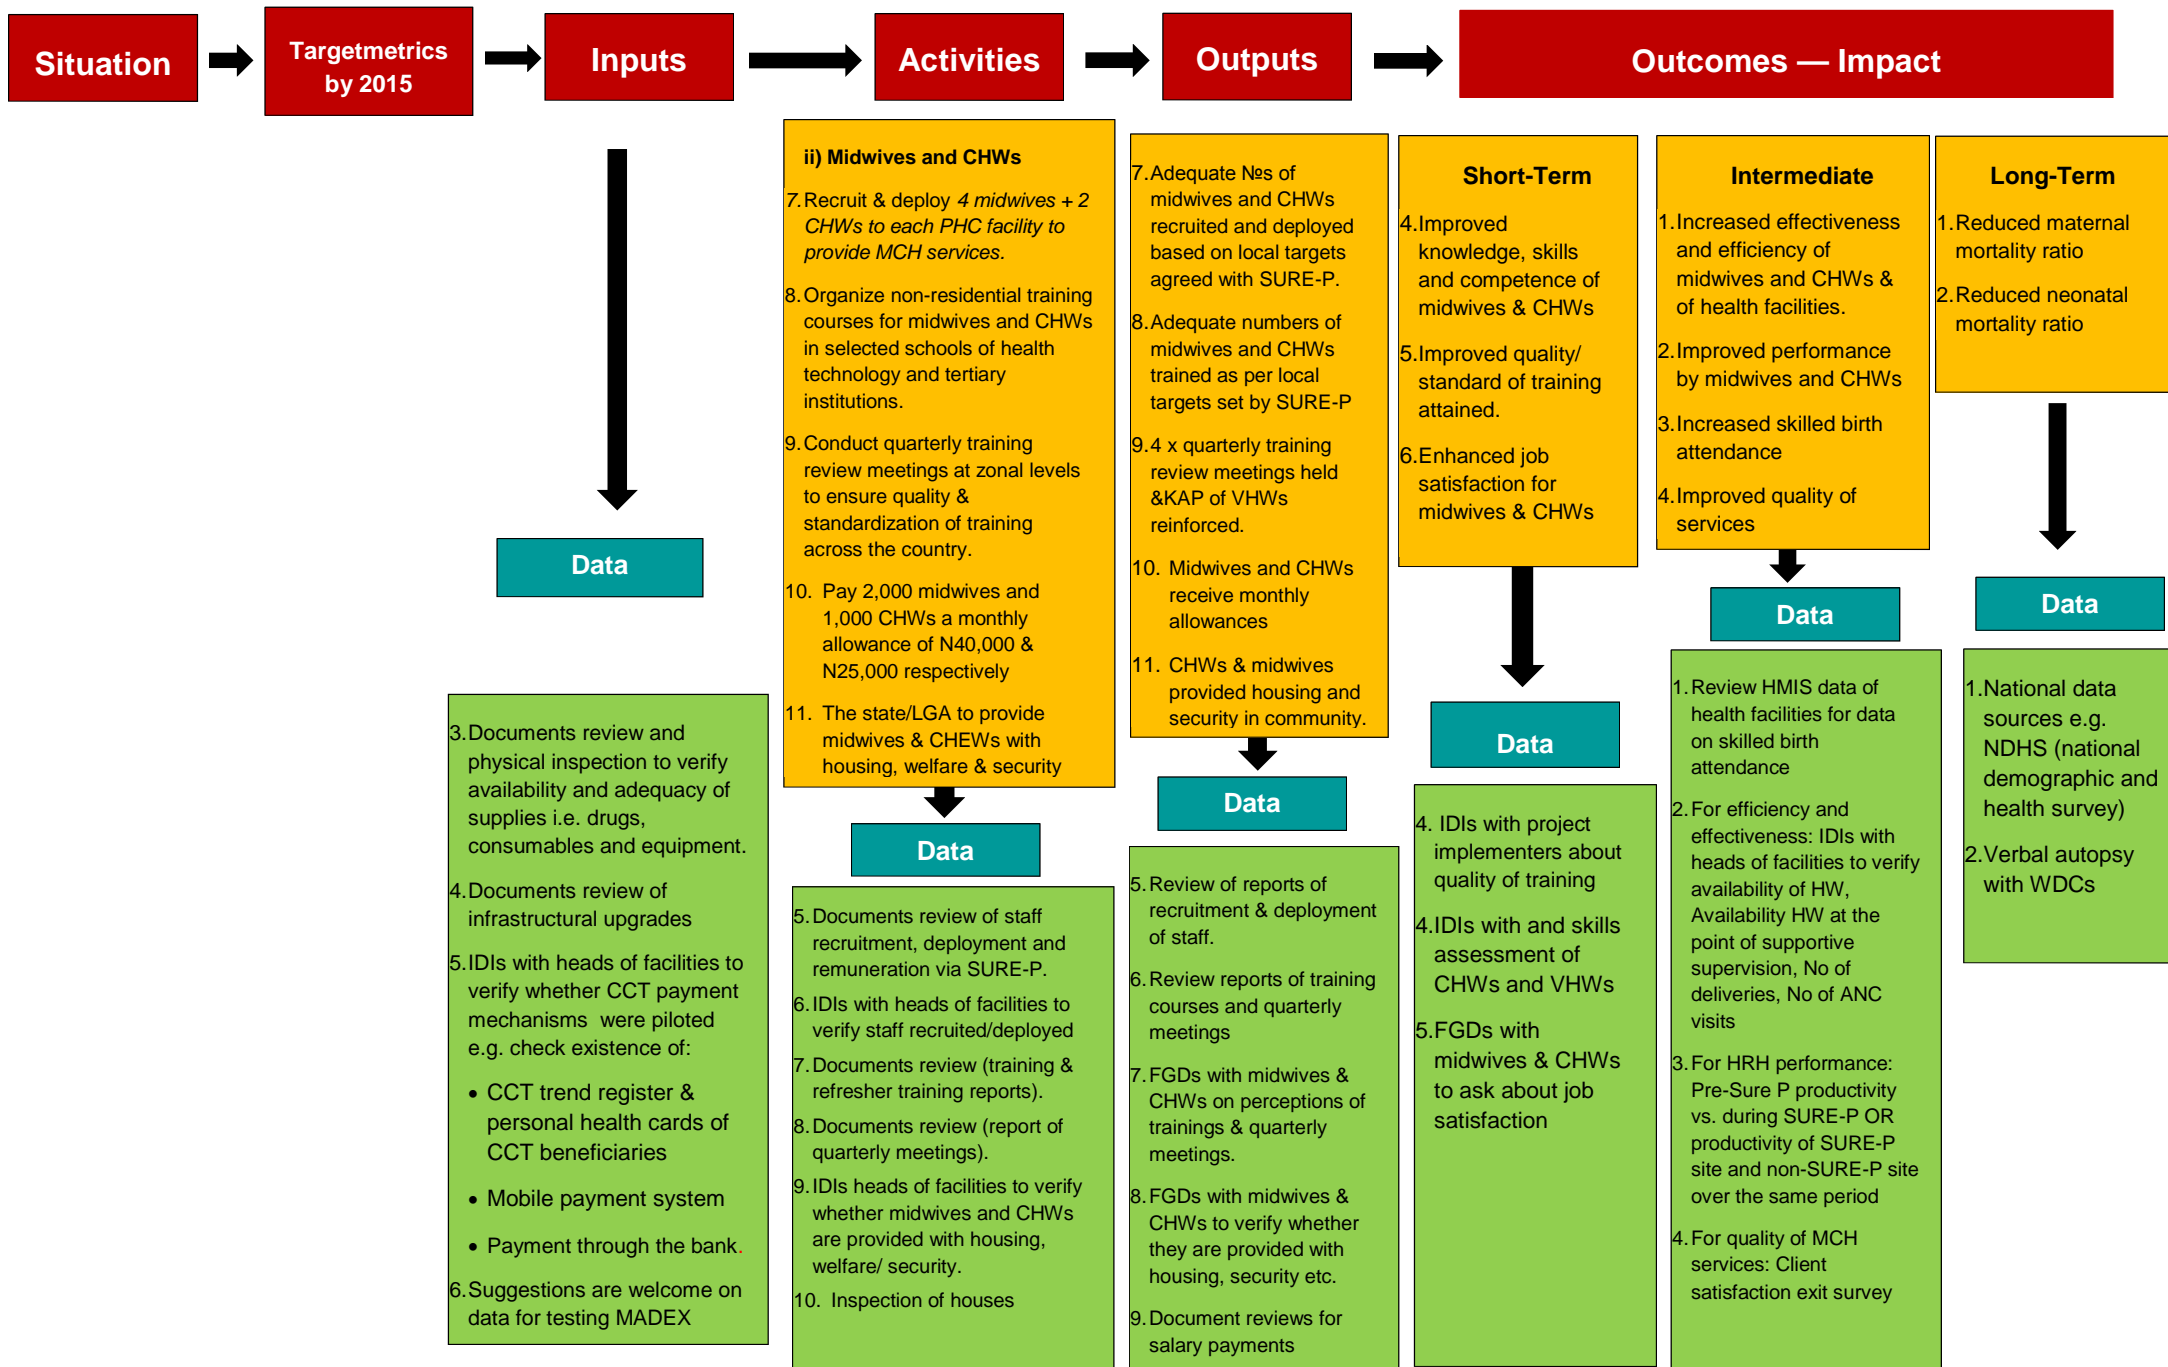

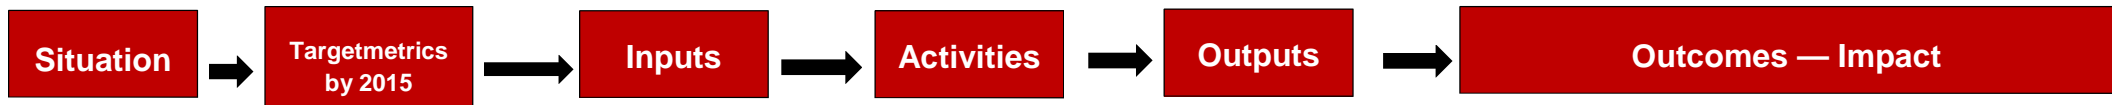

- B) Supply of Kits**
- 12. Supply midwives & CHWs with outreach kit to provide handy tools for skilled delivery even at home
- C) Strengthen PHC facilities**
- 13. 500 facilities to cluster around 125 general hospitals for prompt referral
  - 14. Upgrade 500 PHC facilities, 125 general hospitals, mobile clinics vans and boats
  - 15. Procure standard basic health packages to ensure

**Data**

- 11. Document review to verify supply of outreach kits to midwives and CHWs.
- 12. IDIs with SURE-P programme manager about cost of kit supplied to CHWs/ VHWs; cost of facility upgrades.
- 13. Records review and IDIs with heads of facilities to verify upgrade of facilities
- 14. Records review to verify cost of supplies, commodities and equipment.

- 12. Midwives and CHEWs issued kits to discharge their roles, including skilled delivery.
- 13. Improved clustering of PHCs with general hospitals
- 14. Facilities upgraded to ensure high quality MCH services
- 15. Commodities & appropriate equipment are available to assure high quality service delivery

**Data**

- 10. IDIs with CHWs & midwives about supply of outreach kits.
- 11. Inspection visits to facilities to verify that clustering of facilities promote prompt referral
- 12. Visit facilities to inspect infrastructural upgrade.
- Visit facilities to inspect availability of appropriate supplies /equipment for quality MCH services

- Short-Term**
- 7. Increased Nos of skilled delivery at health facilities and even at home
  - 8. Increased early identification of risk factors/ emergencies for referrals to general hospitals.
  - 9. Increased referral of complications from PHCs to general hospitals.

**Data**

- 6. Documents review i.e. HMIS data of skilled deliveries in health facilities and at home.
- 7. Documents review i.e. HMIS data of trend of identification of risk factors & complications.
- 8. Documents review of HMIS and registers of general hospitals (receiving centres for the referral of complications from PHCs).

- Intermediate**
- 1. Improved efficiency of health system to facilitate achievement of MDGs 4,5 and 6

**Data**

- 4. Suggestions are welcome Re: data for efficiency of health system in achieving MDGs

- Long-Term**
- 1. Reduced maternal mortality ratio
  - 2. Reduced neonatal mortality ratio

**Data**

- 1. State and national data sources e.g. NDHS (national demographic and health survey)
- 2. Verbal autopsy with WDCs

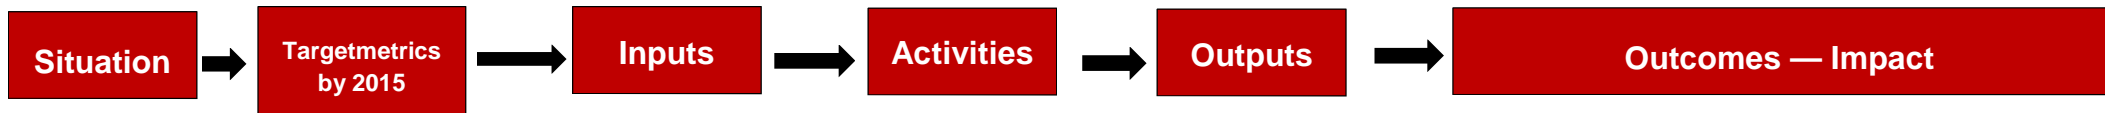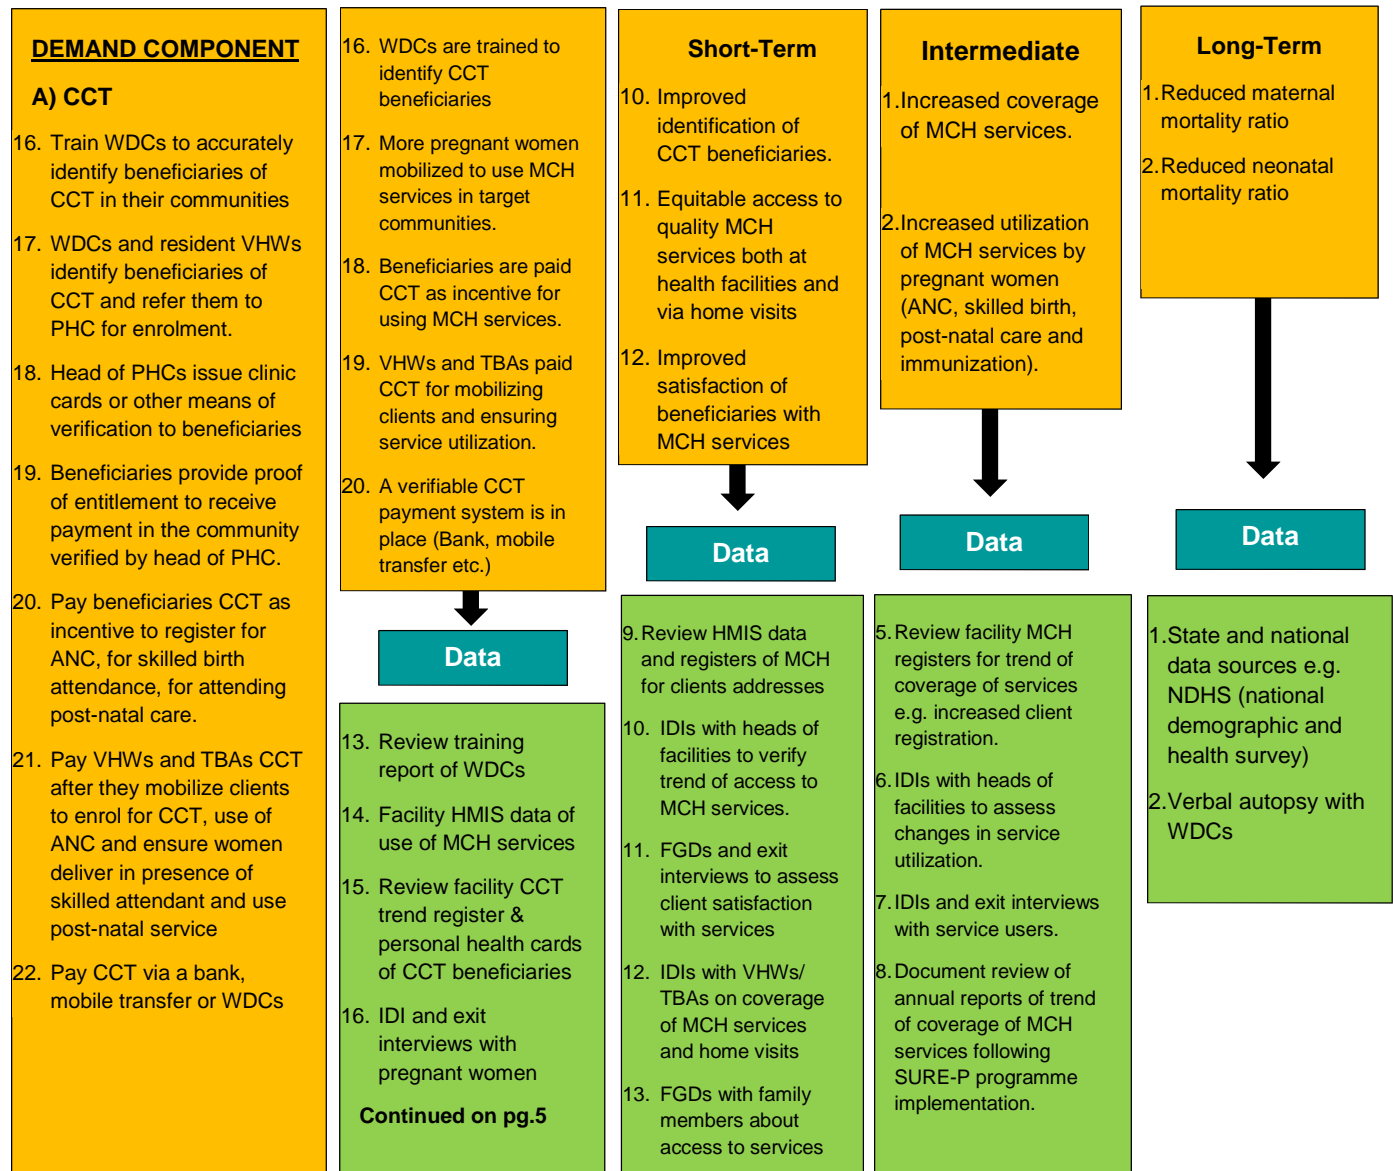

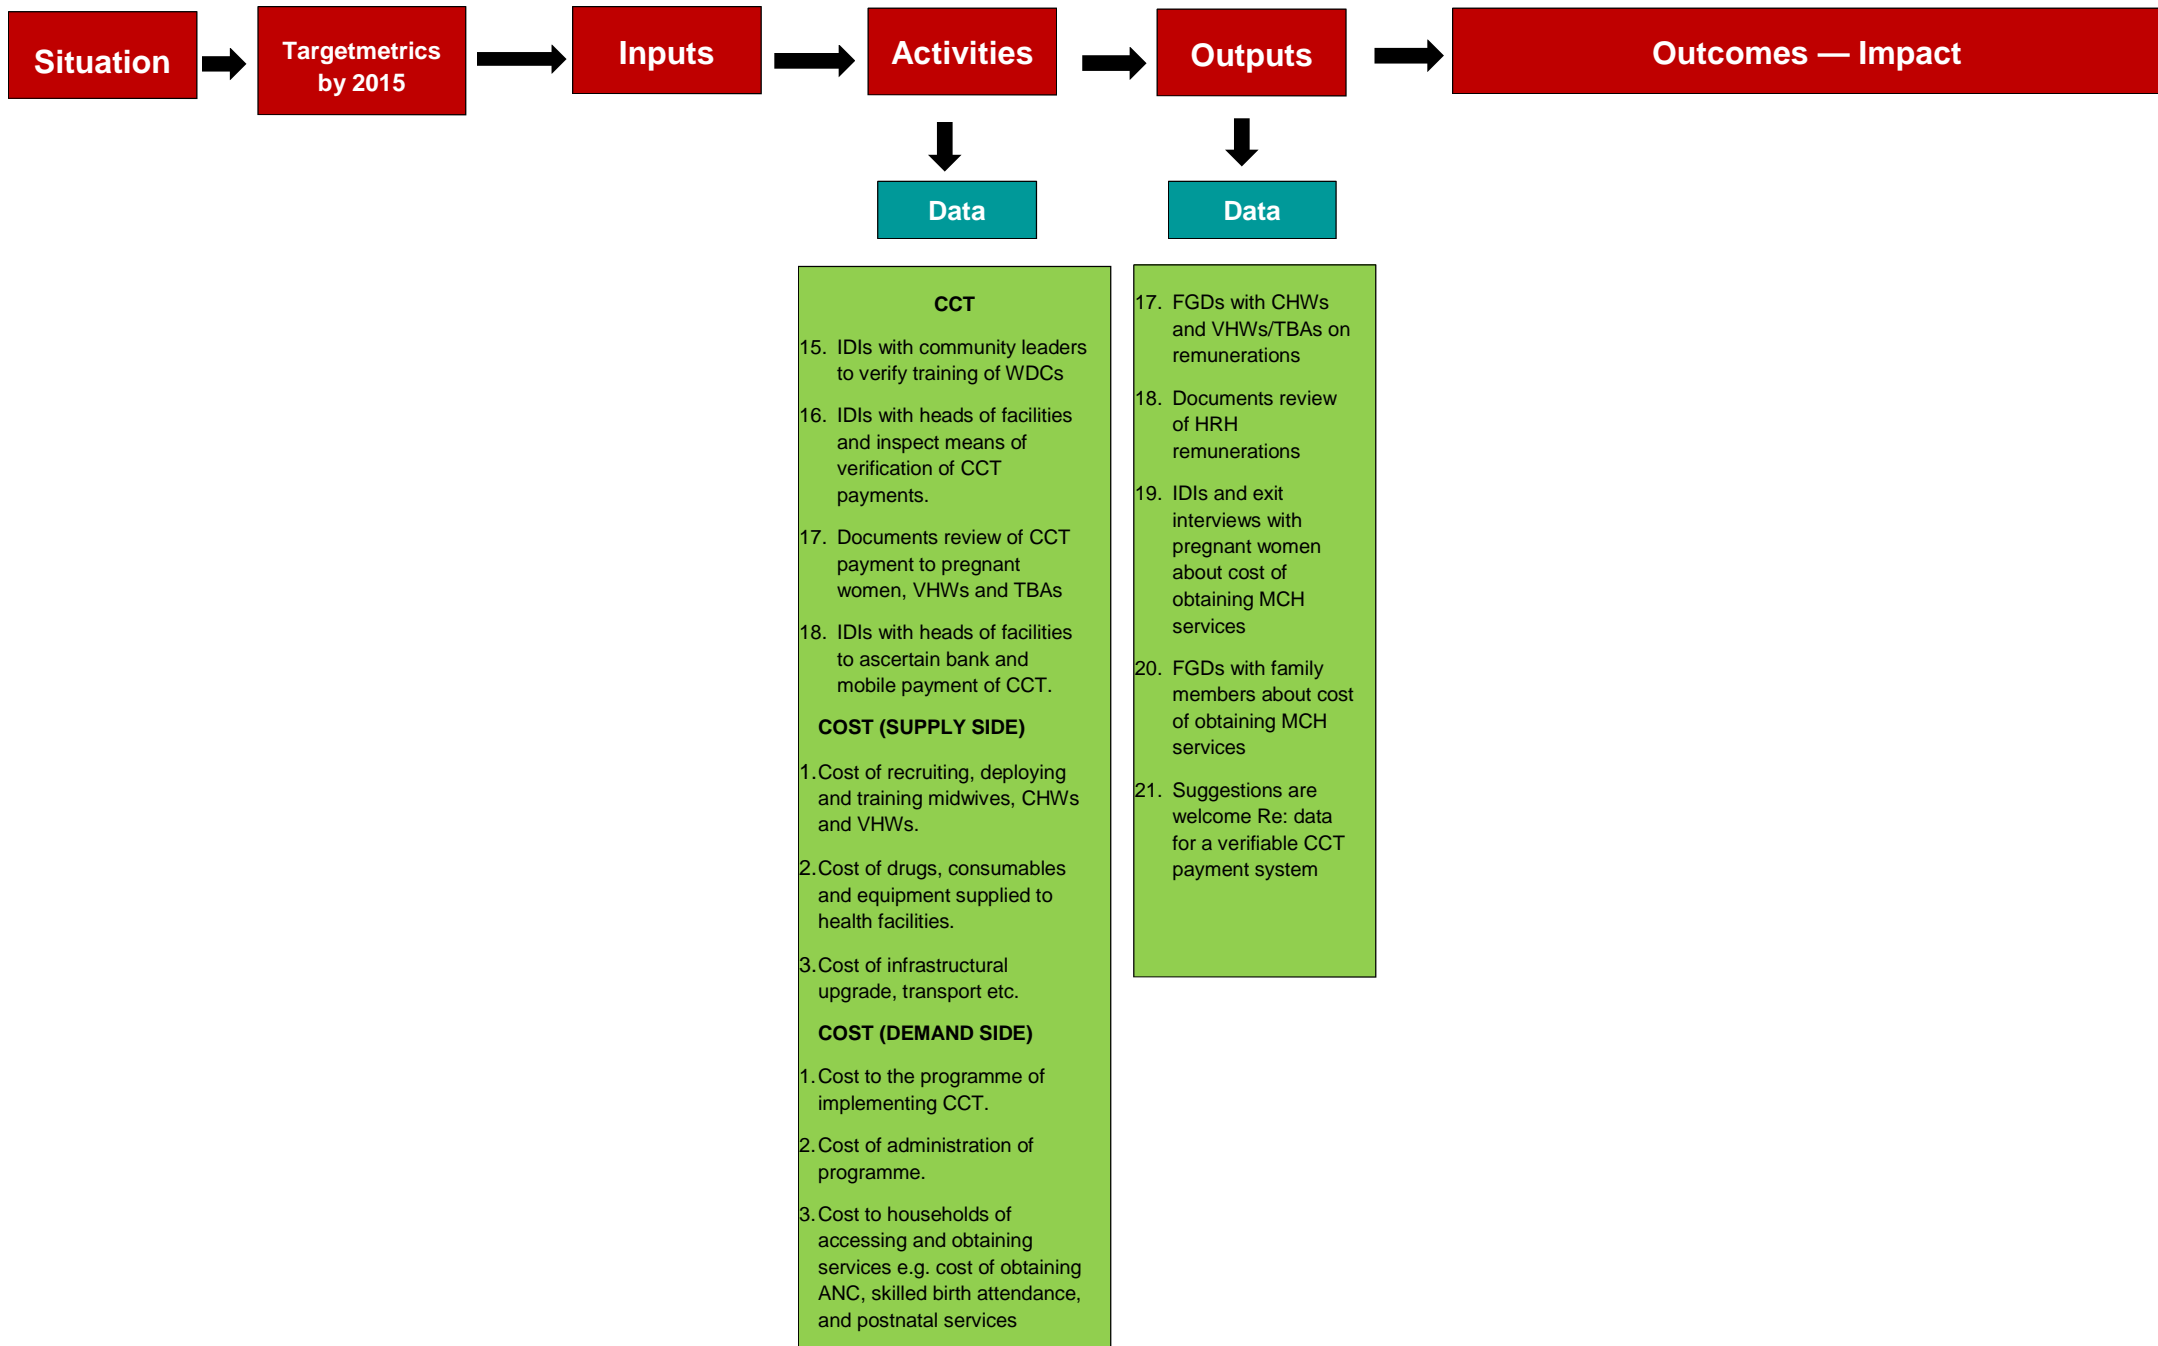

Supplement: MOESM5 [file 10244772]
